# Supplementary material for: Diagnosis of hepatocellular carcinoma based on salivary protein glycopatterns and machine learning algorithms
Source: publisher site journal article supplement (doi:10.1515/cclm-2022-0715), 2022-09-17
Supplement: Supplementary file 1 [file j_cclm-2022-0715_suppl_004.docx]

**Additional file 4**

**Table S4** Selection of optimal features that created the diagnostic panel based on three algorithms.

| **Algorithms** | **HC-model** | **HCC-model** |
| --- | --- | --- |
| LASSO | WFA  GSL-II  PHA-E  PNA  AAL  LEL  BS-I  ConA  DSA  NPA  MAL-I  GNA  BPL  PHA-E+L  SNA | HHL  SJA  LTL  DSA  VVA  ACA |
| SVM-RFE | MAL-I  NPA  SJA  BS-I  AAL  GNA  DBA  ConA | BPL  HHL  DBA  ACA  AAL |
| Boruta | PHA-E+L  MAL-I  BS-I  NPA  BPL  AAL  WGA | HHL  PHA-E  SJA  PNA  AAL  WGA  LTL  BS-I  DSA  VVA  ACA |
